# Supplementary material for: Investigation of the synergistic effect of melt-extension and nanofiller on the crystal–crystal phase transition from form II to I of isotactic polybutene-1
Source: Royal Society of Chemistry journal article supplement (doi:10.1039/d2sm00841f), 2022-01-01
Supplement: d2sm00841f1.pdf [file d2sm00841f1.pdf]

## Supporting information

# Investigation on the synergistic effect of melt-extension and nanofiller on the crystal-crystal phase transition from form II to I of isotactic polybutene-1

Yuru Zhang, Wenjia Wei, Yi Liu, Youxin Ji, Fengmei Su\*, Chuntai Liu

*National Engineering Research Center for Advanced Polymer Processing Technology, The Key Laboratory of Material Processing and Mold of Ministry of Education, College of Materials Science and Engineering, Zhengzhou University, Zhengzhou, 450002, P.R.China*

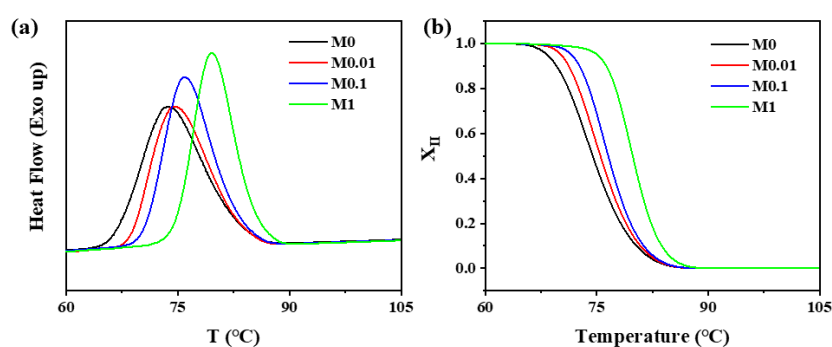

Figure S1 (a) DSC cooling scans during non-isothermal crystallization after melting.  
(b) The evolution of crystallinity during non-isothermal crystallization.

\* correspondence authors: [fmsu@zzu.edu.cn](mailto:fmsu@zzu.edu.cn)

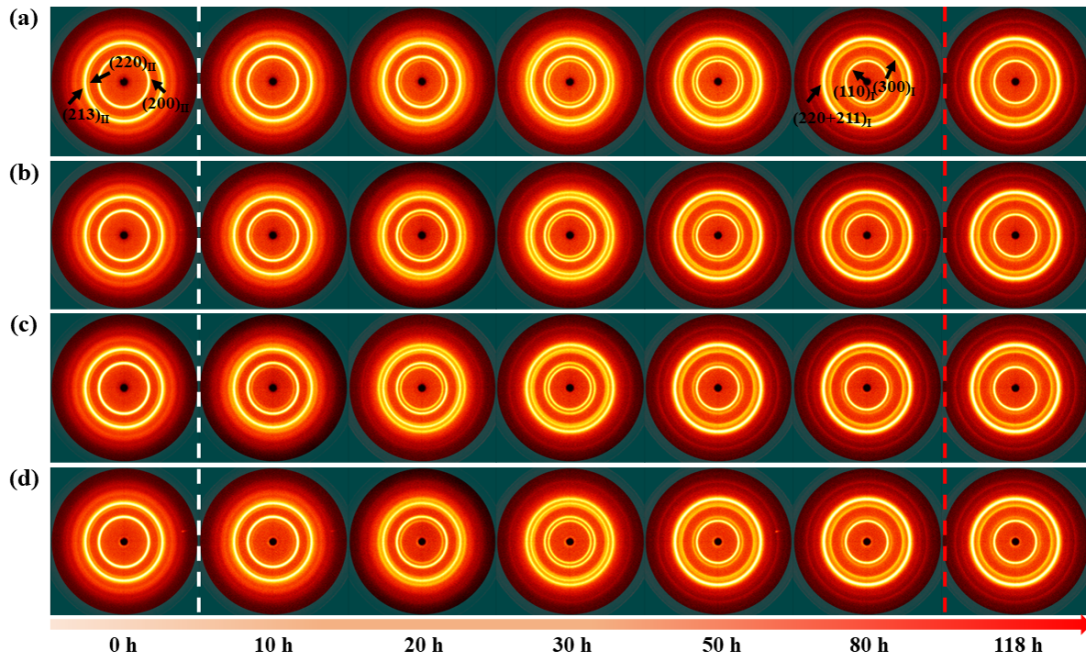

Figure S2 Representative 2D WAXD patterns during phase transition of (a) M0, (b) M0.01, (c) M0.1, and (d) M1 under quiescent condition.

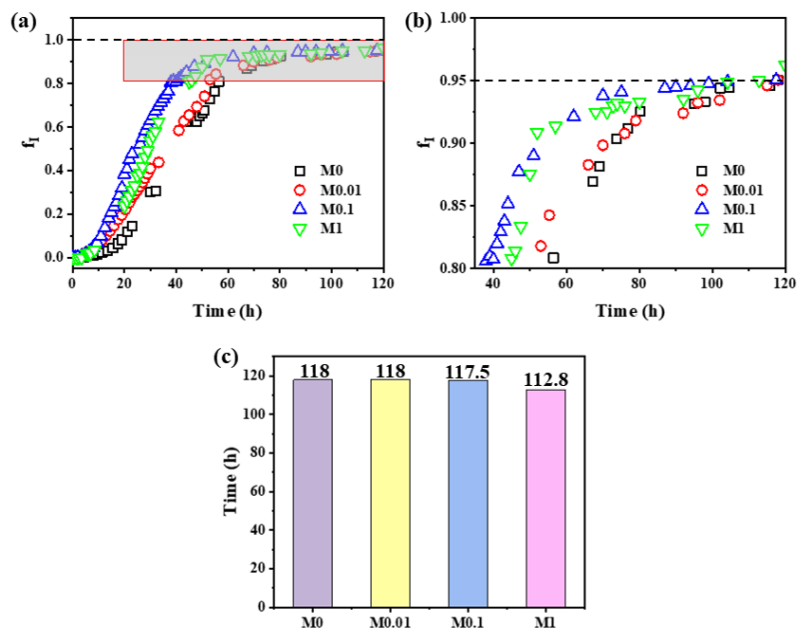

Figure S3 (a) and (b) The evolution of  $(110)_I$  ( $f_I$ ) over time during phase transition. (c) the accomplishment time of phase transition in M0, M0.01, M0.1 and M1.

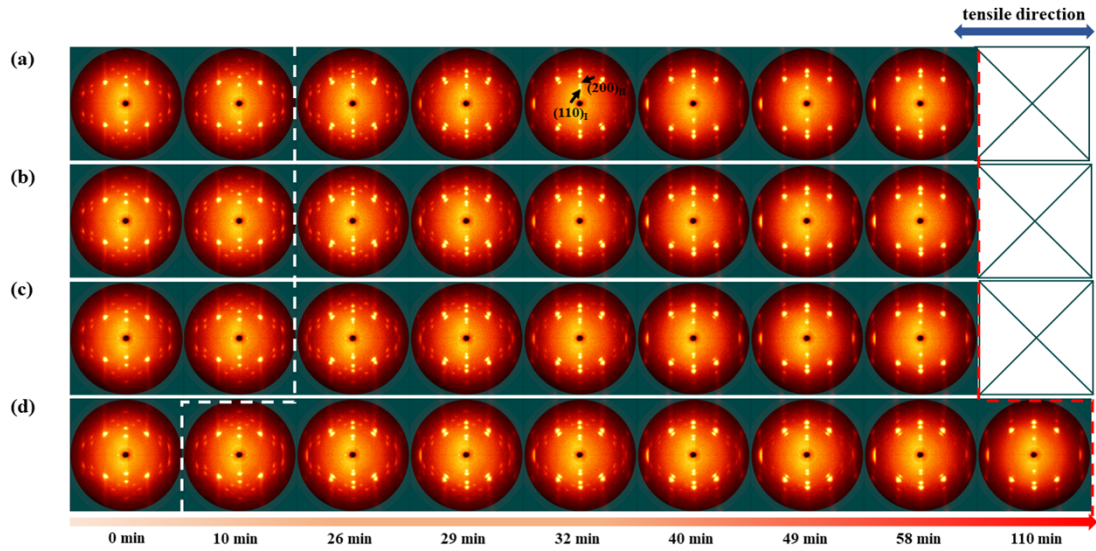

Figure S4 Representative 2D WAXD patterns during phase transition of (a) M0, (b) M0.01, (c) M0.1, and (d) M1 with melt strain of 3.5.

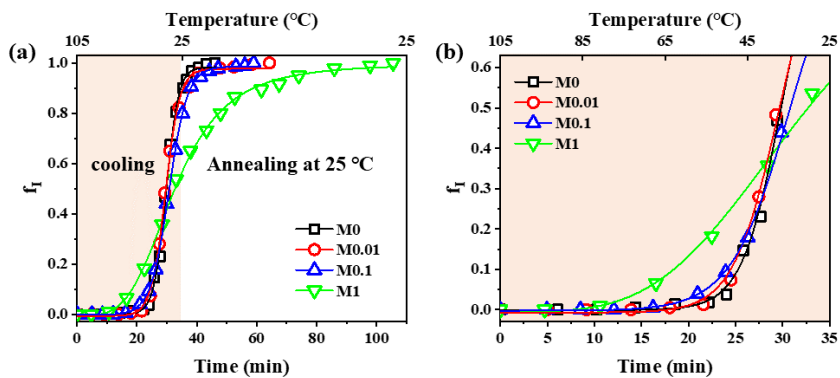

Figure S5 The relationship between the evolution of phase transition and temperature before annealing to room temperature with melt strain 3.5.

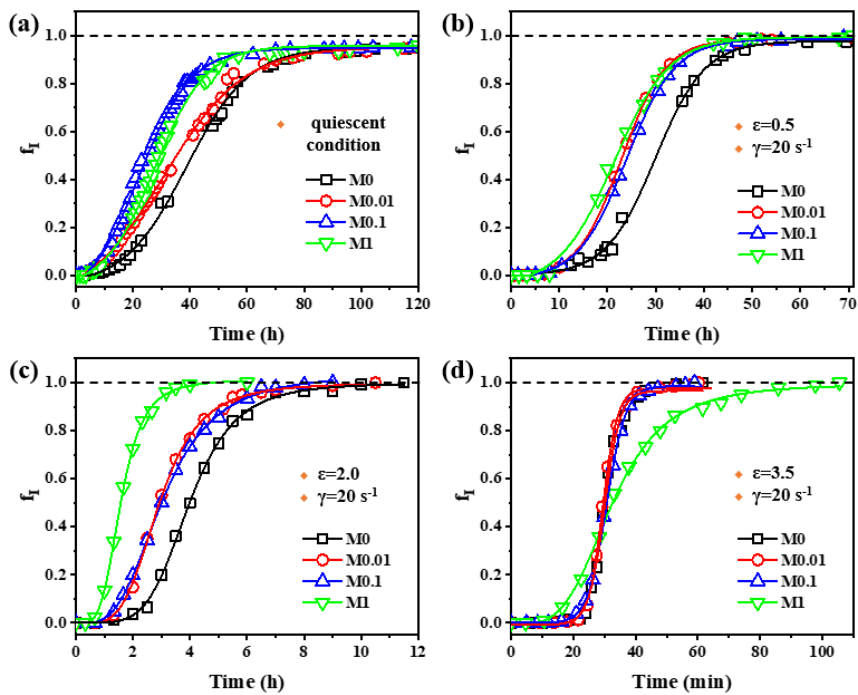

Figure S6 The evolution of form I content ( $f_I$ ) of samples of M0, M0.01, M0.1 and M1 under (a) quiescent condition, with melt strain of (b) 0.5, (c) 2.0 and (d) 3.5, respectively.
